# Supplementary material for: Genomic exploration of sequential clinical isolates reveals a distinctive molecular signature of persistent Staphylococcus aureus bacteraemia
Source: Genome Med. 2018 Aug 23;10:65. doi: 10.1186/s13073-018-0574-x (PMC6090636; doi:10.1186/s13073-018-0574-x)
Supplement: Supplementary file 1 — Table S1. Microbiological data and sequence metrics of S. aureus isolates included in the study. (XLSX 26 kb) [file 13073_2018_574_MOESM1_ESM.xlsx]

## Sheet: invasive pairs
Table S1. Microbiological data and sequence metrics of S. aureus isolates included in the study
Isolate ID	Patient code	Sample collection interval (days)	Sample collection on antistaphylococcal treatment	Duration of treatment of the index episode	Principal antistaphylococcal treatment before sample collection	Type of sample	Site of sampling	Read depth	Genome size	No of assmbled contigs	N50	Percentage of S. aureus reads	MLST	CC	mecA gene	SNP distance to the index sample	Included in the within-host evolution study	Reference (complete genome)	Reference assembly accession (NCBI)	Oxacillin MIC	Vancomycin MIC	agr activity	Doubling time
BPH2704	P_01		0	27		Index	Blood	94	2807265	45	292736	92.99	93	93	Present		Yes	Sa_JKD6159	GCA_000144955.1		0.75	Pos-high	37.4232
BPH2705	P_01	10	1	27	Vancomycin	Paired	Blood	58	2805842	47	225779	94.83	93	93	Present	52	Yes	Sa_JKD6159	GCA_000144955.1		0.75	Pos-high	34.9704
BPH2708	P_02		0	29		Index	Blood	79	2722733	30	282093	94.61	97	97	Absent		Yes	Sa_FDA209P	GCA_001548295.1	0.38	1.5	Pos-high	35.7484
BPH2709	P_02	5	1	29	Flucloxacillin	Paired	Blood	43	2742970	157	209637	96.41	97	97	Absent	31	Yes	Sa_FDA209P	GCA_001548295.1	0.19	2	Pos-high	35.3576
BPH2728	P_03		0	14		Index	Blood	65	2836494	207	303110	93.58	45	45	Present		Yes	Sa_CA-347	GCA_000412775.1		0.75	Neg	34.5765
BPH2729	P_03	38	0	14	Vancomycin	Paired	Blood	49	2830265	172	286003	90.5	45	45	Present	57	Yes	Sa_CA-347	GCA_000412775.1		2	Pos-low	53.907
BPH2732	P_04		0	34		Index	Blood	55	2769483	152	295868	93.73	45	45	Absent		Yes	Sa_CA-347	GCA_000412775.1	0.25	1	Pos-high	37.3029
BPH2733	P_04	4	1	34	Cefazolin	Paired	Blood	74	2752378	50	667237	95.45	45	45	Absent	55	Yes	Sa_CA-347	GCA_000412775.1	0.5	1	Pos-high	37.3532
BPH2737	P_05		1	12		Index	Blood	70	2803393	83	95820	92.71	novel ST type	15	Absent		Yes	Sa_NCTC_8325	GCA_000013425.1	0.75	1.5	Neg	38.4073
BPH2738	P_05	18	1	12	Flucloxacillin	Paired	Blood	43	2794790	135	49300	92.92	novel ST type	15	Absent	28	Yes	Sa_NCTC_8325	GCA_000013425.1	0.19	2	Pos-low	50.6607
BPH2739	P_06		1	44		Index	Blood	56	2769975	166	299596	95.19	novel ST type	20	Absent		No	Sa_11819-97	GCA_000239235.1
BPH2740	P_06	558	0	44	Flucloxacillin	Paired	Blood	97	2728936	41	294703	96.51	12	12	Absent	11035	No	Sa_11819-97	GCA_000239235.1
BPH2750	P_07		0	29		Index	Blood	52	2798312	175	121835	93.38	39	39	Absent		Yes	Sa_ATCC_25923	GCA_000756205.1	0.064	1	Neg	41.7218
BPH2751	P_07	4	1	29	Flucloxacillin	Paired	Blood	63	2803123	184	149063	93.29	39	39	Absent	11	Yes	Sa_ATCC_25923	GCA_000756205.1	0.19	1.5	Neg	41.5091
BPH2754	P_08		0	14		Index	Blood	49	2762515	229	163627	96.86	5	5	Absent		Yes	Sa_SA564	GCA_001281145.1	0.094	1	Pos-high	37.8098
BPH2755	P_08	3	1	14	Vancomycin	Paired	Blood	61	2752939	163	243819	95.48	novel ST type	5	Absent	19	Yes	Sa_SA564	GCA_001281145.1	0.75	0.75	Pos-high	38.4352
BPH2777	P_09		0	17		Index	Blood	208	2855412	91	141378	93.39	30	30	Absent		Yes	Sa_FORC_001	GCA_000772025.1	0.094	0.75	Pos-low	41.5657
BPH2778	P_09	3	1	17	Flucloxacillin	Paired	Blood	98	2859830	91	141378	93.49	30	30	Absent	4	Yes	Sa_FORC_001	GCA_000772025.1	0.38	0.75	Neg	40.2618
BPH2801	P_10		0	15		Index	Blood	171	2732058	77	184207	97.55	59	59	Absent		Yes	Sa_M013	GCA_000237125.1	0.19	1.5	Pos-high	43.0722
BPH2803	P_10	31	0	15	Flucloxacillin	Paired	Blood	39	2721120	53	184199	96.36	59	59	Absent	38	Yes	Sa_M013	GCA_000237125.1	0.19	1	Pos-high	42.548
BPH2804	P_10	171	0	15	Flucloxacillin	Paired	Blood	159	2807645	77	516691	95.98	1	1	Absent	26855	No	Sa_M013	GCA_000237125.1
BPH2819	P_11		0	47		Index	Blood	184	2760066	91	254077	93.93	5	5	Absent		Yes	Sa_SA564	GCA_001281145.1	0.19	1	Pos-low	37.6432
BPH2820	P_11	3	1	47	Flucloxacillin	Paired	Blood	153	2729563	62	295966	97.62	5	5	Absent	6	Yes	Sa_SA564	GCA_001281145.1	0.25	0.5	Pos-low	38.1269
BPH2840	P_12		0	26		Index	Blood	72	2825405	43	818170	95	8	8	Absent		Yes	Sa_NCTC_8325	GCA_000013425.1	0.125	1.5	Pos-high	37.2629
BPH2841	P_12	5	1	26	Cefazolin	Paired	Blood	139	2824512	90	745842	96.36	8	8	Absent	0	Yes	Sa_NCTC_8325	GCA_000013425.1	0.19	1.5	Pos-high	38.811
BPH2861	P_13		0	52		Index	Blood	156	2729043	67	175199	93.67	39	39	Absent		Yes	Sa_ATCC_25923	GCA_000756205.1	0.094	1.5	Pos-low	43.7392
BPH2862	P_13	3	1	52	Flucloxacillin, Vancomycin	Paired	Blood	65	2748466	189	150042	92.02	39	39	Absent	42	Yes	Sa_ATCC_25923	GCA_000756205.1	0.094	1.5	Pos-low	44.2368
BPH2863	P_14		0	18		Index	Blood	61	2818214	154	145475	93.75	novel ST type	30	Absent		Yes	Sa_FORC_001	GCA_000772025.1	0.19	1.5	Neg	44.8166
BPH2864	P_14	4	1	18	Flucloxacillin	Paired	Blood	86	2800948	57	145475	92.17	novel ST type	30	Absent	23	Yes	Sa_FORC_001	GCA_000772025.1	0.19	1.5	Neg	45.5665
BPH2872	P_15		0	47		Index	Blood	165	2809014	79	668898	91.46	novel ST type	5	Absent		Yes	Sa_SA564	GCA_001281145.1	0.094	1	Pos-low	38.31
BPH2873	P_15	5	1	47	Flucloxacillin	Paired	Blood	216	2816723	87	202638	91.68	novel ST type	5	Absent	3	Yes	Sa_SA564	GCA_001281145.1	0.125	1	Pos-low	37.5769
BPH2883	P_16		0	15		Index	Blood	53	2760815	187	349741	96.93	5	5	Absent		Yes	Sa_SA564	GCA_001281145.1	0.094	1.5	Pos-high	39.508
BPH2884	P_16	5	1	15	Flucloxacillin	Paired	Blood	193	2745948	87	254957	97.83	5	5	Absent	11	Yes	Sa_SA564	GCA_001281145.1	0.094	1.5	Pos-high	39.5023
BPH2887	P_17		0	9		Index	Blood	146	2908519	115	271259	92.82	45	45	Present		Yes	Sa_CA-347	GCA_000412775.1		0.75	Neg	39.4479
BPH2888	P_17	6	1	9	Vancomycin	Paired	Blood	134	2912031	110	268888	92.9	45	45	Present	47	Yes	Sa_CA-347	GCA_000412775.1		0.75	Neg	38.6292
BPH2897	P_18		0	3		Index	Blood	136	2818025	111	150218	95.05	34	30	Absent		Yes	Sa_FORC_001	GCA_000772025.1	0.125	1.5	Neg	42.7159
BPH2898	P_18	3	1	3	Flucloxacillin, Vancomycin	Paired	Blood	47	2809522	58	154491	94.16	34	30	Absent	45	Yes	Sa_FORC_001	GCA_000772025.1	0.19	1	Neg	42.2312
BPH2902	P_19		0	101		Index	Blood	121	2835531	69	359185	94.66	45	45	Present		Yes	Sa_CA-347	GCA_000412775.1		0.75	Neg	38.2204
BPH2903	P_19	72		101	Linezolid	Paired	Blood	200	2849870	61	211679	90.83	22	22	Present	37762	No	Sa_CA-347	GCA_000412775.1
BPH2906	P_20		0			Index	Blood	44	2812947	57	170897	94.03	30	30	Absent		No	Sa_FORC_001	GCA_000772025.1
BPH2907	P_20	27	1		Flucloxacillin	Paired	Blood	156	3039788	157	155471	91.77	239	8	Present	28242	No	Sa_FORC_001	GCA_000772025.1
BPH2942	P_21		0	19		Index	Blood	109	2754415	46	764529	94.2	5	5	Absent		Yes	Sa_SA564	GCA_001281145.1	0.25	1.5	Pos-low	37.0641
BPH2943	P_21	65	0	19	Flucloxacillin	Paired	Blood	107	2737678	68	732388	94.8	5	5	Absent	13	Yes	Sa_SA564	GCA_001281145.1	0.125	1	Pos-low	37.2016
BPH2947	P_22		0	51		Index	Blood	126	3017162	110	142830	92.26	239	8	Present		Yes	Sa_TW20	GCA_000027045.1		1.5	Pos-low	46.0724
BPH2948	P_22	9	1	51	Vancomycin	Paired	Blood	126	3017162	104	142830	92.49	239	8	Present	0	Yes	Sa_TW20	GCA_000027045.1		1.5	Neg	46.836
BPH2959	P_23		0	6		Index	Blood	111	2737585	51	701460	96.2	5	5	Absent		Yes	Sa_SA564	GCA_001281145.1	0.125	0.75	Pos-low	41.7097
BPH2960	P_23	3	1	6	Flucloxacillin, Vancomycin	Paired	Blood	122	2743351	69	555830	96.32	5	5	Absent	7	Yes	Sa_SA564	GCA_001281145.1	0.094	0.5	Pos-low	39.9531
BPH2961	P_23	4	1	6	Flucloxacillin, Vancomycin	Paired	Blood	116	2736855	54	555830	96.39	5	5	Absent	11	Yes	Sa_SA564	GCA_001281145.1	0.125	0.75	Neg	40.9898
BPH2962	P_24		0	55		Index	Blood	160	2761138	106	315001	96.88	20	20	Absent		Yes	Sa_11819-97	GCA_000239235.1	0.19	1	Pos-high	35.588
BPH2963	P_24	3	1	55	Flucloxacillin	Paired	Blood	100	2762340	125	298608	96.86	20	20	Absent	15	Yes	Sa_11819-97	GCA_000239235.1	0.125	1	Pos-high	37.6716
BPH2964	P_24	7	1	55	Flucloxacillin	Paired	Blood	149	2761285	84	298833	96.95	20	20	Absent	4	Yes	Sa_11819-97	GCA_000239235.1	0.125	1	Pos-high	37.1375
BPH2965	P_25		0	3		Index	Blood	91	2805061	146	159333	96.89	8	8	Absent		Yes	Sa_NCTC_8325	GCA_000013425.1	0.125	0.75	Pos-low	38.3185
BPH2966	P_25	3	1	3	Flucloxacillin	Paired	Blood	126	2800052	143	147935	96.93	8	8	Absent	5	Yes	Sa_NCTC_8325	GCA_000013425.1	0.19	1	Pos-high	40.3884
BPH2973	P_26		0	49		Index	Blood	132	2777104	77	174849	83.09	39	39	Absent		Yes	Sa_ATCC_25923	GCA_000756205.1	0.064	1	Neg	40.6108
BPH2974	P_26	3	1	49	Flucloxacillin	Paired	Blood	134	2779823	83	174849	83.31	39	39	Absent	11	Yes	Sa_ATCC_25923	GCA_000756205.1	0.064	1	Neg	40.9212
BPH2975	P_26	5	1	49	Flucloxacillin	Paired	Blood	129	2774884	63	175626	84.8	39	39	Absent	2	Yes	Sa_ATCC_25923	GCA_000756205.1	0.064	1	Neg	41.394
BPH2976	P_27		0	52		Index	Blood	115	3037794	116	150187	91.94	novel ST type	8	Present		Yes	Sa_TW20	GCA_000027045.1		1	Neg	46.8708
BPH2977	P_27	3	1	52	Vancomycin	Paired	Blood	117	3035279	111	142557	92	novel ST type	8	Present	0	Yes	Sa_TW20	GCA_000027045.1		1.5	Neg	45.323
BPH2978	P_27	6	1	52	Vancomycin	Paired	Blood	122	3038494	125	135044	91.83	novel ST type	8	Present	1	Yes	Sa_TW20	GCA_000027045.1		1	Neg	46.9215
BPH2979	P_27	8	1	52	Vancomycin	Paired	Blood	149	3037482	133	142131	91.71	novel ST type	8	Present	0	Yes	Sa_TW20	GCA_000027045.1		1.5	Neg	47.0471
BPH2980	P_27	12	1	52	Vancomycin	Paired	Blood	101	3035364	102	150187	91.72	novel ST type	8	Present	2	Yes	Sa_TW20	GCA_000027045.1		1	Neg	45.302
BPH2987	P_28		0	0		Index	Blood	112	2785292	68	190184	95.51	39	39	Absent		Yes	Sa_ATCC_25923	GCA_000756205.1	0.064	1	Pos-low	44.2847
BPH2988	P_28	5	1	0	Cefazolin	Paired	Blood	140	2787982	65	224902	95.55	39	39	Absent	11	Yes	Sa_ATCC_25923	GCA_000756205.1	0.064	1	Pos-low	44.6816
BPH2989	P_29		0	35		Index	Blood	119	2818063	75	352765	95.68	2176	8	Absent		Yes	Sa_NCTC_8325	GCA_000013425.1	0.19	1	Pos-low	38.3005
BPH2990	P_29	6	1	35	Flucloxacillin	Paired	Blood	141	2817798	82	352765	95.89	2176	8	Absent	2	Yes	Sa_NCTC_8325	GCA_000013425.1	0.38	1	Neg	38.1201
BPH2991	P_29	7	1	35	Flucloxacillin	Paired	Blood	138	2820882	74	381895	96.06	2176	8	Absent	2	Yes	Sa_NCTC_8325	GCA_000013425.1	0.38	1	Neg	38.8602
BPH3336	P_30		0	35		Index	Blood	118	2774531	55	191251	88.6	5	5	Present		Yes	Sa_SA564	GCA_001281145.1		1.5	Equivocal	42.1668
BPH3733	P_30	14	1	35	Vancomycin	Paired	Blood	107	2947912	675	191251	92.05	5	5	Present	7	Yes	Sa_SA564	GCA_001281145.1		2		83.5135
BPH3337	P_31		0	51		Index	Blood	95	4427636	4308	46623	89.69	8	8	Absent		Yes	Sa_NCTC_8325	GCA_000013425.1	0.38	1.5	Pos-high	40.708
BPH3734	P_31	7	1	51	Flucloxacillin	Paired	Blood	103	3416290	1851	71186	91.92	8	8	Absent	3	Yes	Sa_NCTC_8325	GCA_000013425.1		1.5		41.1794
BPH3348	P_32		0	13		Index	Blood	85	3057686	250	129445	89.01	239	8	Present		Yes	Sa_TW20	GCA_000027045.1		2	Neg	49.4446
BPH3735	P_32	15	1	13	Vancomycin	Paired	Blood	90	3246896	889	77998	88.65	239	8	Present	0	Yes	Sa_TW20	GCA_000027045.1		2		49.6667
BPH3352	P_33		0			Index	Blood	101	2876232	125	145797	90.98	45	45	Present		Yes	Sa_CA-347	GCA_000412775.1		1.5	Neg	41.9211
BPH3736	P_33	5	1		Vancomycin	Paired	Blood	125	3358235	1461	211785	91.8	45	45	Present	54	Yes	Sa_CA-347	GCA_000412775.1		1.5		41.1094
BPH3356	P_34		0	9		Index	Blood	95	3092914	330	100543	89.57	239	8	Present		Yes	Sa_TW20	GCA_000027045.1		2	Pos-low	49.1921
BPH3737	P_34	9	1	9	Vancomycin	Paired	Blood	101	3113546	521	76402	89.98	239	8	Present	0	Yes	Sa_TW20	GCA_000027045.1		2		50.1396
BPH3381	P_35		0	1		Index	Blood	126	2758147	54	302514	92.74	1795	45	Absent		Yes	Sa_CA-347	GCA_000412775.1	0.5	1.5	Pos-high	42.6376
BPH3738	P_35	5	1	1	Flucloxacillin	Paired	Blood	98	3521883	2090	133804	92.53	1795	45	Absent	33	Yes	Sa_CA-347	GCA_000412775.1		2		43.8439
BPH3390	P_36	260	0	16		Paired	Blood	133	2697783	89	182603	90.16	45	45	Present	39071	No	Sa_CA-347	GCA_000412775.1
BPH3739	P_36		0	16		Index	Blood	135	3012863	118	135225	90.36	239	8	Present		No	Sa_CA-347	GCA_000412775.1
BPH3399	P_37		0	46		Index	Blood	85	2922111	433	241933	93.13	93	93	Present		Yes	Sa_JKD6159	GCA_000144955.1		1.5	Pos-low	40.7641
BPH3740	P_37	13	1	46	Vancomycin	Paired	Blood	110	3313922	1543	153846	93.35	93	93	Present	725	Yes	Sa_JKD6159	GCA_000144955.1		2		43.1904
BPH3401	P_38		0	15		Index	Blood	84	3129210	494	155411	90.48	239	8	Present		Yes	Sa_TW20	GCA_000027045.1		3	Equivocal	45.9518
BPH3741	P_38	20	1	15	Vancomycin	Paired	Blood	106	2996667	108	86536	90.24	239	8	Present	2	Yes	Sa_TW20	GCA_000027045.1		3		44.6905
BPH3742	P_38	47	0	15	Vancomycin	Paired	Blood	101	3138216	548	143884	90.63	239	8	Present	1	Yes	Sa_TW20	GCA_000027045.1		3		44.6677
BPH3743	P_38	78	0	15	Vancomycin	Paired	Blood	115	3003956	168	88253	90.06	239	8	Present	3	Yes	Sa_TW20	GCA_000027045.1		3		45.155
BPH3744	P_38	478	0	15	Vancomycin	Paired	Blood	115	2988510	131	59328	90.28	239	8	Present	3	Yes	Sa_TW20	GCA_000027045.1		3		45.2173
BPH3417	P_39	23	0	62		Paired	Blood	96	3292596	945	109382	88.85	239	8	Present	0	Yes	Sa_TW20	GCA_000027045.1		3	Neg	45.1887
BPH3745	P_39		0	62		Index	Blood	132	2998186	109	142356	91.65	239	8	Present		Yes	Sa_TW20	GCA_000027045.1		3		46.7016
BPH3423	P_40	8				Paired	Blood	85	2895579	498	210167	94.57	20	20	Absent	13	Yes	Sa_11819-97	GCA_000239235.1	0.25	1.5	Pos-high	41.6947
BPH3746	P_40					Index	Blood	101	2925903	627	130228	94.8	20	20	Absent		Yes	Sa_11819-97	GCA_000239235.1	0.25	2		40.4744
BPH3427	P_41					Index	Blood	142	2762832	93	174139	95.7	22	22	Present		Yes	Sa_HO_5096_0412	GCA_000284535.1		1.5	Pos-high	41.9178
BPH3747	P_41	8				Paired	Blood	108	3180970	1340	108303	94.3	22	22	Present	14	Yes	Sa_HO_5096_0412	GCA_000284535.1		1.5		43.4846
BPH3433	P_42		0	8		Index	Blood	93	3066383	328	142782	90.37	239	8	Present		Yes	Sa_TW20	GCA_000027045.1		2	Neg	44.7646
BPH3748	P_42	9	0	8	Vancomycin	Paired	Blood	110	2998774	125	106921	89.99	239	8	Present	0	Yes	Sa_TW20	GCA_000027045.1		3		46.5996
BPH3437	P_43					Index	Blood	90	2975555	600	173727	92.48	22	22	Present		Yes	Sa_HO_5096_0412	GCA_000284535.1		1.5	Neg	41.571
BPH3749	P_43	30				Paired	Blood	108	3392850	1838	108182	91.91	22	22	Present	42	Yes	Sa_HO_5096_0412	GCA_000284535.1		2		41.5084
BPH3453	P_44					Index	Blood	102	3311180	958	98931	88	239	8	Present		No	Sa_TW20	GCA_000027045.1
BPH3750	P_44	12				Paired	Blood	110	2807274	129	108182	93.86	22	22	Present	25738	No	Sa_TW20	GCA_000027045.1
BPH3471	P_45					Index	Blood	104	3102118	878	27898	93.45	novel ST type	15	Absent		No	Sa_NCTC_8325	GCA_000013425.1
BPH3751	P_45	8				Paired	Blood	116	2799336	91	125429	93.9	22	22	Present	22566	No	Sa_NCTC_8325	GCA_000013425.1
BPH3535	P_46		0	33		Index	Blood	78	3104970	412	109382	90.24	239	8	Present		Yes	Sa_TW20	GCA_000027045.1		2	Neg	50.6981
BPH3752	P_46	23	1	33	Vancomycin	Paired	Blood	116	3820840	2322	53403	88.96	239	8	Present	1	Yes	Sa_TW20	GCA_000027045.1		3		48.9075
BPH3674	P_47					Index	Blood	146	2975725	384	112006	90.99	239	8	Present		Yes	Sa_str._JKD6008	GCA_000145595.1		2	Pos-low	63.3064
BPH3753	P_47	38				Paired	Blood	116	3047859	626	93162	90.86	239	8	Present	0	Yes	Sa_str._JKD6008	GCA_000145595.1		2		63.0548
BPH3690	P_48		0	18		Index	Blood	78	2930220	603	68461	91.78	22	22	Present		Yes	Sa_HO_5096_0412	GCA_000284535.1		1	Pos-high	41.5061
BPH3754	P_48	15	1	18	Vancomycin	Paired	Blood	111	2784310	94	99339	91.61	22	22	Present	34	Yes	Sa_HO_5096_0412	GCA_000284535.1		1.5		42.1871
BPH3694	P_49					Index	Blood	119	2887110	135	72541	91.18	239	8	Present		Yes	Sa_str._JKD6008	GCA_000145595.1		1.5	Pos-low	53.6776
BPH3755	P_49	10				Paired	Blood	111	3321114	1403	56081	90.8	239	8	Present	0	Yes	Sa_str._JKD6008	GCA_000145595.1		1.5		53.7301
BPH3706	P_50					Index	Blood	116	3459277	1635	57817	90.64	239	8	Present		Yes	Sa_str._JKD6008	GCA_000145595.1		1.5	Pos-low	58.0113
BPH3757	P_50	36				Paired	Blood	110	2898497	129	63226	90.47	239	8	Present	1	Yes	Sa_str._JKD6008	GCA_000145595.1		1.5		59.5487

## Sheet: colonising pairs
Table S1. Microbiological data and sequence metrics of S. aureus isolates included in the study
Isolate ID	Patient code	Sample collection interval (days)	Type of sample	Site of sampling	Read depth	Genome size	No of assmbled contigs	N50	Percentage of S. aureus reads	MLST	CC	mecA gene	SNP distance to the index sample	Included in the within-host evolution study	Reference (complete genome)	Reference assembly accession (NCBI)	Oxacillin MIC	Vancomycin MIC	agr activity	Doubling time
BPH2728	P_03		Index	Blood	65	2836494	207	303110	93.58	45	45	Present		Yes	Sa_CA-347	GCA_000412775.1		0.75	Neg	34.5765
BPH2732	P_04		Index	Blood	55	2769483	152	295868	93.73	45	45	Absent		Yes	Sa_CA-347	GCA_000412775.1	0.25	1	Pos-high	37.3029
BPH2902	P_19		Index	Blood	121	2835531	69	359185	94.66	45	45	Present		Yes	Sa_CA-347	GCA_000412775.1		0.75	Neg	38.2204
BPH2976	P_27		Index	Blood	115	3037794	116	150187	91.94	novel ST type	8	Present		Yes	Sa_TW20	GCA_000027045.1		1	Neg	46.8708
BPH2730	P_03	-13	Paired	Nose	50	2793248	115	57409	95.16	45	45	Present	80	Yes	Sa_CA-347	GCA_000412775.1		1.5	Neg	34.2141
BPH2734	P_04	-58	Paired	Nose	68	2847393	64	145229	94.96	34	30	Absent	32596	No	Sa_CA-347	GCA_000412775.1
BPH2904	P_19	1	Paired	Nose	113	2837895	81	285678	94.55	45	45	Present	44	Yes	Sa_CA-347	GCA_000412775.1		0.75	Pos-low	40.5564
BPH2981	P_27	5	Paired	Nose	145	3039582	121	155412	91.96	novel ST type	8	Present	5	Yes	Sa_TW20	GCA_000027045.1		1.5	Neg	45.008
BPH2982	P_27	-139	Paired	Nose	145	3061937	145	142557	91.26	novel ST type	8	Present	9	Yes	Sa_TW20	GCA_000027045.1		2	Neg	53.9131
BPH2700	P_51		Index	Blood	65	2739134	34	363749	94.14	78	88	Present		No	Sa_AUS0325	GCA_900096745.1
BPH2701	P_51	1	Paired	Nose	70	2826597	278	104202	95.51	22	22	Present	26252	No	Sa_AUS0325	GCA_900096745.1
BPH2726	P_52		Index	Blood	58	2931570	67	165224	93.29	239	8	Absent		Yes	Sa_TW20	GCA_000027045.1		1	Neg	42.7925
BPH2727	P_52	0	Paired	Nose	79	2929328	62	165224	92.27	239	8	Absent	7	Yes	Sa_TW20	GCA_000027045.1		1.5	Pos-low	41.887
BPH2747	P_53		Index	Blood	198	3008046	81	155513	91.26	239	8	Present		Yes	Sa_TW20	GCA_000027045.1		1	Pos-low	41.3965
BPH2748	P_53	8	Paired	Nose	51	3003382	118	70209	91.27	239	8	Present	3	Yes	Sa_TW20	GCA_000027045.1		1	Neg	41.9173
BPH2763	P_54		Index	Blood	94	2805919	52	351231	93.18	78	88	Present		Yes	Sa_AUS0325	GCA_900096745.1		1	Neg	37.8608
BPH2764	P_54	-3	Paired	Nose	58	2799832	91	94048	92.71	78	88	Present	26	Yes	Sa_AUS0325	GCA_900096745.1		1	Pos-high	36.524
BPH2770	P_55		Index	Blood	87	2832570	74	103921	87.96	45	45	Present		Yes	Sa_CA-347	GCA_000412775.1		0.75	Pos-low	46.5618
BPH2771	P_55	0	Paired	Nose	86	2838478	86	104542	89.44	45	45	Present	61	Yes	Sa_CA-347	GCA_000412775.1		1	Pos-low	44.8575
BPH2881	P_56		Index	Blood	92	2818879	32	431056	89.09	1756	5	Present		Yes	Sa_SA564	GCA_001281145.1		1	Pos-low	37.9865
BPH2882	P_56	127	Paired	Nose	59	2822615	64	169104	93.33	1756	5	Present	19	Yes	Sa_SA564	GCA_001281145.1		1	Equivocal	38.9864
BPH2952	P_57		Index	Blood	159	2783608	87	478389	95.58	45	45	Present		Yes	Sa_CA-347	GCA_000412775.1		0.75	Pos-low	41.6621
BPH2953	P_57	-85	Paired	Nose	111	2783585	76	481899	95.67	45	45	Present	72	Yes	Sa_CA-347	GCA_000412775.1		0.75	Pos-low	41.3064
